# Supplementary material for: Specialized odorant receptors in social insects that detect cuticular hydrocarbon cues and candidate pheromones
Source: PubMed Central journal article supplement (PMC5561057; doi:10.1038/s41467-017-00099-1), 2017-08-17
Supplement: 41467_2017_99_MOESM1_ESM.pdf [file 41467_2017_99_MOESM1_ESM.pdf]

File Name: Supplementary Information  
Description: Supplementary Figure.

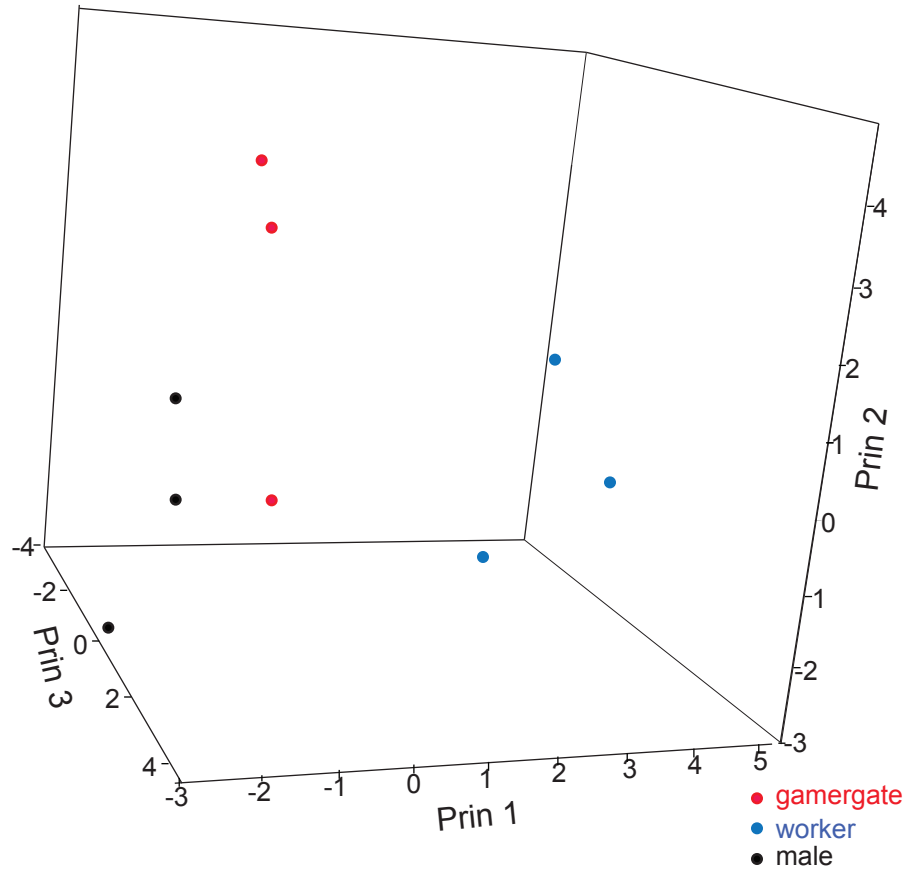

### Supplementary Figure 1

The first three principal components of a receptor activity-based space of cuticular extracts from three individuals each of the males, gamergates, and workers.
